# Supplementary material for: Highly sensitive fluorescence probe based on functional SBA-15 for selective detection of Hg2+in aqueous media
Source: Royal Society of Chemistry journal article supplement (doi:10.1039/b815287j), 2008-12-22
Supplement: b815287j.pdf [file b815287j.pdf]

## Supporting Materials

### Highly Sensitive Fluorescence Probe based on functional SBA-15 for Selective Detection of Hg<sup>2+</sup> in Aqueous Media

Peng Zhou<sup>a,b</sup>, Qingtao Meng<sup>a</sup>, Guangjie He<sup>a</sup>, Hongmei Wu<sup>a</sup>, Chunying Duan\*<sup>a</sup> and Xie Quan<sup>b</sup>

<sup>a</sup>State Key Laboratory of Fine Chemicals, Dalian University of Technology, 158 Zhongshan Road, Dalian 116012, China, E-mail:  
[cyduan@dlut.edu.cn](mailto:cyduan@dlut.edu.cn)

<sup>b</sup>Key Laboratory of Industrial Ecology and Environmental Engineering (Ministry of Education), School of Environmental and  
Biological Science and Technology, Dalian University of Technology, Dalian 116024, China

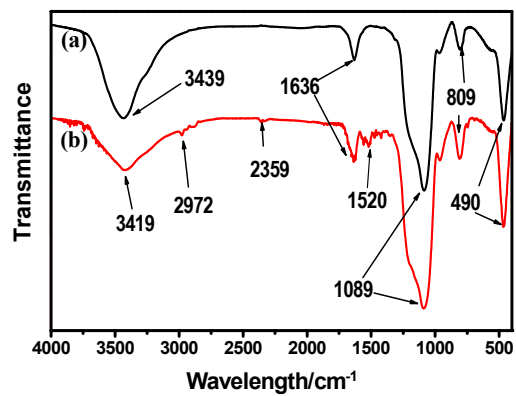

**Fig. S1** IR spectra for (a) SBA-15 (black line) and (b) R6G-SBA-15 (red line).

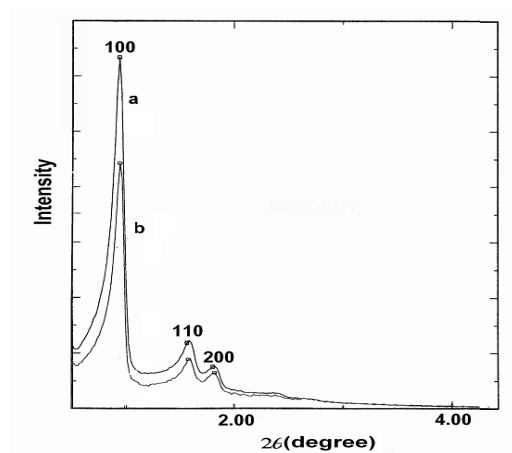

**Fig. S2** XRD power patterns of (a) SBA-15 and (b) R6G-SBA-15.

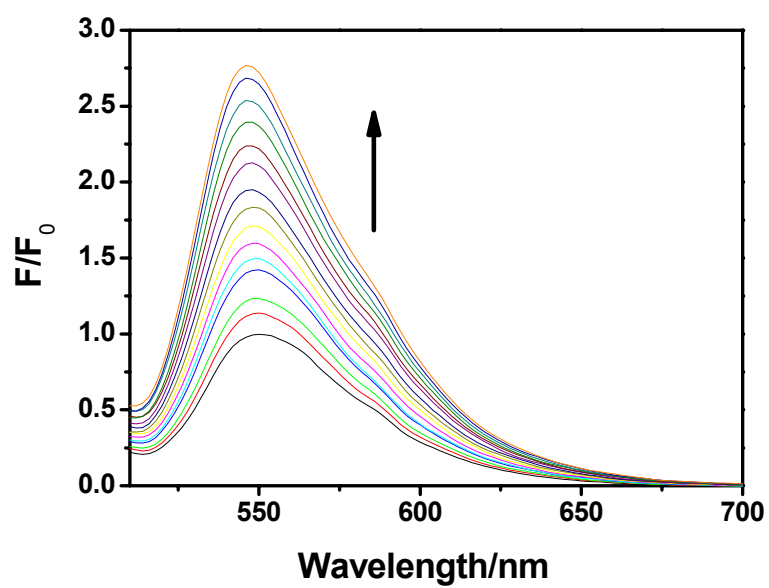

**Fig. S3** Fluorescence spectral changes of **R6G-SBA-15** (0.02 g/L) with different concentrations of Hg<sup>2+</sup> (1~15 ppb) in aqueous solution. Excitation at 500nm.
